# Supplementary material for: Antioxidant, Anti-Inflammatory and Antidiabetic Proprieties of LC-MS/MS Identified Polyphenols from Coriander Seeds
Source: PubMed Central journal article supplement (PMC7831938; doi:10.3390/molecules26020487), 2021-01-18
Supplement: molecules-26-00487-s001.pdf [file molecules-26-00487-s001.pdf]

| Molecule                       | Identified fragments           | <i>Coriandrium sativum</i> seeds (PCS)                                                                                                                                                                                                                                                                                                                                                                                                                                                                                                                                                            | Standard in ACN (dil 1:1000)                                                                                                                                                                                                         |     |      |   |               |    |                                                                                                                                                                                                                                                                                                                                                                                                                                             |               |     |                                                                                                                                                                                                                                                                                                                                                                                                                                                                                                            |               |               |                                                                                                                                                                                                                                                                                                                                                                                                                                                                                                                                                                                  |   |               |      |   |               |   |   |               |   |   |               |   |
|--------------------------------|--------------------------------|---------------------------------------------------------------------------------------------------------------------------------------------------------------------------------------------------------------------------------------------------------------------------------------------------------------------------------------------------------------------------------------------------------------------------------------------------------------------------------------------------------------------------------------------------------------------------------------------------|--------------------------------------------------------------------------------------------------------------------------------------------------------------------------------------------------------------------------------------|-----|------|---|---------------|----|---------------------------------------------------------------------------------------------------------------------------------------------------------------------------------------------------------------------------------------------------------------------------------------------------------------------------------------------------------------------------------------------------------------------------------------------|---------------|-----|------------------------------------------------------------------------------------------------------------------------------------------------------------------------------------------------------------------------------------------------------------------------------------------------------------------------------------------------------------------------------------------------------------------------------------------------------------------------------------------------------------|---------------|---------------|----------------------------------------------------------------------------------------------------------------------------------------------------------------------------------------------------------------------------------------------------------------------------------------------------------------------------------------------------------------------------------------------------------------------------------------------------------------------------------------------------------------------------------------------------------------------------------|---|---------------|------|---|---------------|---|---|---------------|---|---|---------------|---|
| Vanillic acid                  | 167.00>123.00<br>167.00>167.00 | 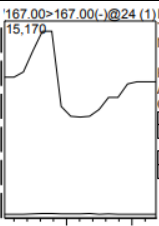 <p>167.00&gt;167.00(-)@24 (1)ID# 24 m/z: 167.00&gt;123.00<br/>Type:Target<br/>Name:vanillic acid<br/>Ret.Time:0.000<br/>Area:0<br/>Conc.:N.D.(Peak)</p> <table border="1"> <thead> <tr> <th>#</th> <th>m/z</th> <th>Area</th> </tr> </thead> <tbody> <tr> <td>1</td> <td>167.00&gt;167.00</td> <td>0</td> </tr> </tbody> </table> <p>⊖%<br/>0.00</p>                                                                                                                                                            | #                                                                                                                                                                                                                                    | m/z | Area | 1 | 167.00>167.00 | 0  |  <p>167.00&gt;167.00(-)@24 (1)ID# 24 m/z: 167.00&gt;123.00<br/>Type:Target<br/>Name:vanillic acid<br/>Ret.Time:0.000<br/>Area:0<br/>Conc.:N.D.(Peak)</p> <table border="1"> <thead> <tr> <th>#</th> <th>m/z</th> <th>Area</th> </tr> </thead> <tbody> <tr> <td>1</td> <td>167.00&gt;167.00</td> <td>0</td> </tr> </tbody> </table> <p>⊖%<br/>0.00</p>    | #             | m/z | Area                                                                                                                                                                                                                                                                                                                                                                                                                                                                                                       | 1             | 167.00>167.00 | 0                                                                                                                                                                                                                                                                                                                                                                                                                                                                                                                                                                                |   |               |      |   |               |   |   |               |   |   |               |   |
| #                              | m/z                            | Area                                                                                                                                                                                                                                                                                                                                                                                                                                                                                                                                                                                              |                                                                                                                                                                                                                                      |     |      |   |               |    |                                                                                                                                                                                                                                                                                                                                                                                                                                             |               |     |                                                                                                                                                                                                                                                                                                                                                                                                                                                                                                            |               |               |                                                                                                                                                                                                                                                                                                                                                                                                                                                                                                                                                                                  |   |               |      |   |               |   |   |               |   |   |               |   |
| 1                              | 167.00>167.00                  | 0                                                                                                                                                                                                                                                                                                                                                                                                                                                                                                                                                                                                 |                                                                                                                                                                                                                                      |     |      |   |               |    |                                                                                                                                                                                                                                                                                                                                                                                                                                             |               |     |                                                                                                                                                                                                                                                                                                                                                                                                                                                                                                            |               |               |                                                                                                                                                                                                                                                                                                                                                                                                                                                                                                                                                                                  |   |               |      |   |               |   |   |               |   |   |               |   |
| #                              | m/z                            | Area                                                                                                                                                                                                                                                                                                                                                                                                                                                                                                                                                                                              |                                                                                                                                                                                                                                      |     |      |   |               |    |                                                                                                                                                                                                                                                                                                                                                                                                                                             |               |     |                                                                                                                                                                                                                                                                                                                                                                                                                                                                                                            |               |               |                                                                                                                                                                                                                                                                                                                                                                                                                                                                                                                                                                                  |   |               |      |   |               |   |   |               |   |   |               |   |
| 1                              | 167.00>167.00                  | 0                                                                                                                                                                                                                                                                                                                                                                                                                                                                                                                                                                                                 |                                                                                                                                                                                                                                      |     |      |   |               |    |                                                                                                                                                                                                                                                                                                                                                                                                                                             |               |     |                                                                                                                                                                                                                                                                                                                                                                                                                                                                                                            |               |               |                                                                                                                                                                                                                                                                                                                                                                                                                                                                                                                                                                                  |   |               |      |   |               |   |   |               |   |   |               |   |
| Chlorogenic acid               | 353.00>190.00<br>353.00>353.00 |  <p>353.00&gt;353.00(-)@33 (1)ID# 33 m/z: 353.00&gt;190.00<br/>Type:Target<br/>Name:chlorogenic acid<br/>Ret.Time:0.000<br/>Area:0<br/>Conc.:N.D.(Peak)</p> <table border="1"> <thead> <tr> <th>#</th> <th>m/z</th> <th>Area</th> </tr> </thead> <tbody> <tr> <td>1</td> <td>353.00&gt;353.00</td> <td>0</td> </tr> </tbody> </table> <p>⊖%<br/>0.00</p>                                                                                                                                                         | #                                                                                                                                                                                                                                    | m/z | Area | 1 | 353.00>353.00 | 0  |  <p>353.00&gt;353.00(-)@33 (1)ID# 33 m/z: 353.00&gt;190.00<br/>Type:Target<br/>Name:chlorogenic acid<br/>Ret.Time:0.000<br/>Area:0<br/>Conc.:N.D.(Peak)</p> <table border="1"> <thead> <tr> <th>#</th> <th>m/z</th> <th>Area</th> </tr> </thead> <tbody> <tr> <td>1</td> <td>353.00&gt;353.00</td> <td>0</td> </tr> </tbody> </table> <p>⊖%<br/>0.00</p> | #             | m/z | Area                                                                                                                                                                                                                                                                                                                                                                                                                                                                                                       | 1             | 353.00>353.00 | 0                                                                                                                                                                                                                                                                                                                                                                                                                                                                                                                                                                                |   |               |      |   |               |   |   |               |   |   |               |   |
| #                              | m/z                            | Area                                                                                                                                                                                                                                                                                                                                                                                                                                                                                                                                                                                              |                                                                                                                                                                                                                                      |     |      |   |               |    |                                                                                                                                                                                                                                                                                                                                                                                                                                             |               |     |                                                                                                                                                                                                                                                                                                                                                                                                                                                                                                            |               |               |                                                                                                                                                                                                                                                                                                                                                                                                                                                                                                                                                                                  |   |               |      |   |               |   |   |               |   |   |               |   |
| 1                              | 353.00>353.00                  | 0                                                                                                                                                                                                                                                                                                                                                                                                                                                                                                                                                                                                 |                                                                                                                                                                                                                                      |     |      |   |               |    |                                                                                                                                                                                                                                                                                                                                                                                                                                             |               |     |                                                                                                                                                                                                                                                                                                                                                                                                                                                                                                            |               |               |                                                                                                                                                                                                                                                                                                                                                                                                                                                                                                                                                                                  |   |               |      |   |               |   |   |               |   |   |               |   |
| #                              | m/z                            | Area                                                                                                                                                                                                                                                                                                                                                                                                                                                                                                                                                                                              |                                                                                                                                                                                                                                      |     |      |   |               |    |                                                                                                                                                                                                                                                                                                                                                                                                                                             |               |     |                                                                                                                                                                                                                                                                                                                                                                                                                                                                                                            |               |               |                                                                                                                                                                                                                                                                                                                                                                                                                                                                                                                                                                                  |   |               |      |   |               |   |   |               |   |   |               |   |
| 1                              | 353.00>353.00                  | 0                                                                                                                                                                                                                                                                                                                                                                                                                                                                                                                                                                                                 |                                                                                                                                                                                                                                      |     |      |   |               |    |                                                                                                                                                                                                                                                                                                                                                                                                                                             |               |     |                                                                                                                                                                                                                                                                                                                                                                                                                                                                                                            |               |               |                                                                                                                                                                                                                                                                                                                                                                                                                                                                                                                                                                                  |   |               |      |   |               |   |   |               |   |   |               |   |
| Oleuropein                     | 539.00>539.00                  |  <p>539.00&gt;539.00(-)@20ID# 20 m/z: 539.00&gt;539.00<br/>Type:Target<br/>Name:OLEUROPEIN<br/>Ret.Time:0.000<br/>Area:0<br/>Conc.:N.D.(W/B)</p>                                                                                                                                                                                                                                                                                                                                                                 |  <p>539.00&gt;539.00(-)@20ID# 20 m/z: 539.00&gt;539.00<br/>Type:Target<br/>Name:OLEUROPEIN<br/>Ret.Time:0.000<br/>Area:0<br/>Conc.:N.D.(Peak)</p> |     |      |   |               |    |                                                                                                                                                                                                                                                                                                                                                                                                                                             |               |     |                                                                                                                                                                                                                                                                                                                                                                                                                                                                                                            |               |               |                                                                                                                                                                                                                                                                                                                                                                                                                                                                                                                                                                                  |   |               |      |   |               |   |   |               |   |   |               |   |
| Epicatechin gallate            | 441.00>289.00<br>441.00>441.00 |  <p>441.00&gt;441.00(-)@36 (1)ID# 36 m/z: 441.00&gt;289.00<br/>Type:Target<br/>Name:epicatechin gallate<br/>Ret.Time:0.000<br/>Area:0<br/>Conc.:N.D.(Peak)</p> <table border="1"> <thead> <tr> <th>#</th> <th>m/z</th> <th>Area</th> </tr> </thead> <tbody> <tr> <td>1</td> <td>441.00&gt;169.00</td> <td>0</td> </tr> <tr> <td>2</td> <td>441.00&gt;441.00</td> <td>0</td> </tr> </tbody> </table> <p>⊖%<br/>0.00</p>                                                                                          | #                                                                                                                                                                                                                                    | m/z | Area | 1 | 441.00>169.00 | 0  | 2                                                                                                                                                                                                                                                                                                                                                                                                                                           | 441.00>441.00 | 0   |  <p>441.00&gt;441.00(-)@36 (1)ID# 36 m/z: 441.00&gt;289.00<br/>Type:Target<br/>Name:epicatechin gallate<br/>Ret.Time:0.000<br/>Area:0<br/>Conc.:N.D.(Peak)</p> <table border="1"> <thead> <tr> <th>#</th> <th>m/z</th> <th>Area</th> </tr> </thead> <tbody> <tr> <td>1</td> <td>441.00&gt;169.00</td> <td>0</td> </tr> <tr> <td>2</td> <td>441.00&gt;441.00</td> <td>0</td> </tr> </tbody> </table> <p>⊖%<br/>0.00</p> | #             | m/z           | Area                                                                                                                                                                                                                                                                                                                                                                                                                                                                                                                                                                             | 1 | 441.00>169.00 | 0    | 2 | 441.00>441.00 | 0 |   |               |   |   |               |   |
| #                              | m/z                            | Area                                                                                                                                                                                                                                                                                                                                                                                                                                                                                                                                                                                              |                                                                                                                                                                                                                                      |     |      |   |               |    |                                                                                                                                                                                                                                                                                                                                                                                                                                             |               |     |                                                                                                                                                                                                                                                                                                                                                                                                                                                                                                            |               |               |                                                                                                                                                                                                                                                                                                                                                                                                                                                                                                                                                                                  |   |               |      |   |               |   |   |               |   |   |               |   |
| 1                              | 441.00>169.00                  | 0                                                                                                                                                                                                                                                                                                                                                                                                                                                                                                                                                                                                 |                                                                                                                                                                                                                                      |     |      |   |               |    |                                                                                                                                                                                                                                                                                                                                                                                                                                             |               |     |                                                                                                                                                                                                                                                                                                                                                                                                                                                                                                            |               |               |                                                                                                                                                                                                                                                                                                                                                                                                                                                                                                                                                                                  |   |               |      |   |               |   |   |               |   |   |               |   |
| 2                              | 441.00>441.00                  | 0                                                                                                                                                                                                                                                                                                                                                                                                                                                                                                                                                                                                 |                                                                                                                                                                                                                                      |     |      |   |               |    |                                                                                                                                                                                                                                                                                                                                                                                                                                             |               |     |                                                                                                                                                                                                                                                                                                                                                                                                                                                                                                            |               |               |                                                                                                                                                                                                                                                                                                                                                                                                                                                                                                                                                                                  |   |               |      |   |               |   |   |               |   |   |               |   |
| #                              | m/z                            | Area                                                                                                                                                                                                                                                                                                                                                                                                                                                                                                                                                                                              |                                                                                                                                                                                                                                      |     |      |   |               |    |                                                                                                                                                                                                                                                                                                                                                                                                                                             |               |     |                                                                                                                                                                                                                                                                                                                                                                                                                                                                                                            |               |               |                                                                                                                                                                                                                                                                                                                                                                                                                                                                                                                                                                                  |   |               |      |   |               |   |   |               |   |   |               |   |
| 1                              | 441.00>169.00                  | 0                                                                                                                                                                                                                                                                                                                                                                                                                                                                                                                                                                                                 |                                                                                                                                                                                                                                      |     |      |   |               |    |                                                                                                                                                                                                                                                                                                                                                                                                                                             |               |     |                                                                                                                                                                                                                                                                                                                                                                                                                                                                                                            |               |               |                                                                                                                                                                                                                                                                                                                                                                                                                                                                                                                                                                                  |   |               |      |   |               |   |   |               |   |   |               |   |
| 2                              | 441.00>441.00                  | 0                                                                                                                                                                                                                                                                                                                                                                                                                                                                                                                                                                                                 |                                                                                                                                                                                                                                      |     |      |   |               |    |                                                                                                                                                                                                                                                                                                                                                                                                                                             |               |     |                                                                                                                                                                                                                                                                                                                                                                                                                                                                                                            |               |               |                                                                                                                                                                                                                                                                                                                                                                                                                                                                                                                                                                                  |   |               |      |   |               |   |   |               |   |   |               |   |
| Catechin\ Epicatechin          | 289.00>245.00<br>289.00>289.00 |  <p>289.00&gt;289.00(-)@34 (1)ID# 34 m/z: 289.00&gt;245.00<br/>Type:Target<br/>Name:catechin/epicatechin<br/>Ret.Time:0.000<br/>Area:0<br/>Conc.:N.D.(Peak)</p> <table border="1"> <thead> <tr> <th>#</th> <th>m/z</th> <th>Area</th> </tr> </thead> <tbody> <tr> <td>1</td> <td>289.00&gt;205.00</td> <td>0</td> </tr> <tr> <td>2</td> <td>289.00&gt;179.00</td> <td>0</td> </tr> <tr> <td>3</td> <td>289.00&gt;289.00</td> <td>0</td> </tr> </tbody> </table> <p>⊖%<br/>0.00</p>                             | #                                                                                                                                                                                                                                    | m/z | Area | 1 | 289.00>205.00 | 0  | 2                                                                                                                                                                                                                                                                                                                                                                                                                                           | 289.00>179.00 | 0   | 3                                                                                                                                                                                                                                                                                                                                                                                                                                                                                                          | 289.00>289.00 | 0             |  <p>289.00&gt;289.00(-)@34 (1)ID# 34 m/z: 289.00&gt;245.00<br/>Type:Target<br/>Name:catechin/epicatechin<br/>Ret.Time:0.000<br/>Area:0<br/>Conc.:N.D.(Peak)</p> <table border="1"> <thead> <tr> <th>#</th> <th>m/z</th> <th>Area</th> </tr> </thead> <tbody> <tr> <td>1</td> <td>289.00&gt;205.00</td> <td>0</td> </tr> <tr> <td>2</td> <td>289.00&gt;179.00</td> <td>0</td> </tr> <tr> <td>3</td> <td>289.00&gt;289.00</td> <td>0</td> </tr> </tbody> </table> <p>⊖%<br/>0.00</p>          | # | m/z           | Area | 1 | 289.00>205.00 | 0 | 2 | 289.00>179.00 | 0 | 3 | 289.00>289.00 | 0 |
| #                              | m/z                            | Area                                                                                                                                                                                                                                                                                                                                                                                                                                                                                                                                                                                              |                                                                                                                                                                                                                                      |     |      |   |               |    |                                                                                                                                                                                                                                                                                                                                                                                                                                             |               |     |                                                                                                                                                                                                                                                                                                                                                                                                                                                                                                            |               |               |                                                                                                                                                                                                                                                                                                                                                                                                                                                                                                                                                                                  |   |               |      |   |               |   |   |               |   |   |               |   |
| 1                              | 289.00>205.00                  | 0                                                                                                                                                                                                                                                                                                                                                                                                                                                                                                                                                                                                 |                                                                                                                                                                                                                                      |     |      |   |               |    |                                                                                                                                                                                                                                                                                                                                                                                                                                             |               |     |                                                                                                                                                                                                                                                                                                                                                                                                                                                                                                            |               |               |                                                                                                                                                                                                                                                                                                                                                                                                                                                                                                                                                                                  |   |               |      |   |               |   |   |               |   |   |               |   |
| 2                              | 289.00>179.00                  | 0                                                                                                                                                                                                                                                                                                                                                                                                                                                                                                                                                                                                 |                                                                                                                                                                                                                                      |     |      |   |               |    |                                                                                                                                                                                                                                                                                                                                                                                                                                             |               |     |                                                                                                                                                                                                                                                                                                                                                                                                                                                                                                            |               |               |                                                                                                                                                                                                                                                                                                                                                                                                                                                                                                                                                                                  |   |               |      |   |               |   |   |               |   |   |               |   |
| 3                              | 289.00>289.00                  | 0                                                                                                                                                                                                                                                                                                                                                                                                                                                                                                                                                                                                 |                                                                                                                                                                                                                                      |     |      |   |               |    |                                                                                                                                                                                                                                                                                                                                                                                                                                             |               |     |                                                                                                                                                                                                                                                                                                                                                                                                                                                                                                            |               |               |                                                                                                                                                                                                                                                                                                                                                                                                                                                                                                                                                                                  |   |               |      |   |               |   |   |               |   |   |               |   |
| #                              | m/z                            | Area                                                                                                                                                                                                                                                                                                                                                                                                                                                                                                                                                                                              |                                                                                                                                                                                                                                      |     |      |   |               |    |                                                                                                                                                                                                                                                                                                                                                                                                                                             |               |     |                                                                                                                                                                                                                                                                                                                                                                                                                                                                                                            |               |               |                                                                                                                                                                                                                                                                                                                                                                                                                                                                                                                                                                                  |   |               |      |   |               |   |   |               |   |   |               |   |
| 1                              | 289.00>205.00                  | 0                                                                                                                                                                                                                                                                                                                                                                                                                                                                                                                                                                                                 |                                                                                                                                                                                                                                      |     |      |   |               |    |                                                                                                                                                                                                                                                                                                                                                                                                                                             |               |     |                                                                                                                                                                                                                                                                                                                                                                                                                                                                                                            |               |               |                                                                                                                                                                                                                                                                                                                                                                                                                                                                                                                                                                                  |   |               |      |   |               |   |   |               |   |   |               |   |
| 2                              | 289.00>179.00                  | 0                                                                                                                                                                                                                                                                                                                                                                                                                                                                                                                                                                                                 |                                                                                                                                                                                                                                      |     |      |   |               |    |                                                                                                                                                                                                                                                                                                                                                                                                                                             |               |     |                                                                                                                                                                                                                                                                                                                                                                                                                                                                                                            |               |               |                                                                                                                                                                                                                                                                                                                                                                                                                                                                                                                                                                                  |   |               |      |   |               |   |   |               |   |   |               |   |
| 3                              | 289.00>289.00                  | 0                                                                                                                                                                                                                                                                                                                                                                                                                                                                                                                                                                                                 |                                                                                                                                                                                                                                      |     |      |   |               |    |                                                                                                                                                                                                                                                                                                                                                                                                                                             |               |     |                                                                                                                                                                                                                                                                                                                                                                                                                                                                                                            |               |               |                                                                                                                                                                                                                                                                                                                                                                                                                                                                                                                                                                                  |   |               |      |   |               |   |   |               |   |   |               |   |
| Galocatechin\ Epigallocatechin | 457.00>169.00<br>457.00>457.00 |  <p>457.00&gt;457.00(-)@35 (1)ID# 35 m/z: 457.00&gt;169.00<br/>Type:Target<br/>Name:galocatechin/epigallocatechin<br/>Ret.Time:0.000<br/>Area:0<br/>Conc.:N.D.(W/B)</p> <table border="1"> <thead> <tr> <th>#</th> <th>m/z</th> <th>Area</th> </tr> </thead> <tbody> <tr> <td>1</td> <td>457.00&gt;331.00</td> <td>22</td> </tr> <tr> <td>2</td> <td>457.00&gt;305.00</td> <td>248</td> </tr> <tr> <td>3</td> <td>457.00&gt;457.00</td> <td>102680</td> </tr> </tbody> </table> <p>⊖%<br/>16.42<br/>185.08</p> | #                                                                                                                                                                                                                                    | m/z | Area | 1 | 457.00>331.00 | 22 | 2                                                                                                                                                                                                                                                                                                                                                                                                                                           | 457.00>305.00 | 248 | 3                                                                                                                                                                                                                                                                                                                                                                                                                                                                                                          | 457.00>457.00 | 102680        |  <p>457.00&gt;457.00(-)@35 (1)ID# 35 m/z: 457.00&gt;169.00<br/>Type:Target<br/>Name:galocatechin/epigallocatechin<br/>Ret.Time:0.000<br/>Area:0<br/>Conc.:N.D.(Peak)</p> <table border="1"> <thead> <tr> <th>#</th> <th>m/z</th> <th>Area</th> </tr> </thead> <tbody> <tr> <td>1</td> <td>457.00&gt;331.00</td> <td>0</td> </tr> <tr> <td>2</td> <td>457.00&gt;305.00</td> <td>0</td> </tr> <tr> <td>3</td> <td>457.00&gt;457.00</td> <td>0</td> </tr> </tbody> </table> <p>⊖%<br/>0.00</p> | # | m/z           | Area | 1 | 457.00>331.00 | 0 | 2 | 457.00>305.00 | 0 | 3 | 457.00>457.00 | 0 |
| #                              | m/z                            | Area                                                                                                                                                                                                                                                                                                                                                                                                                                                                                                                                                                                              |                                                                                                                                                                                                                                      |     |      |   |               |    |                                                                                                                                                                                                                                                                                                                                                                                                                                             |               |     |                                                                                                                                                                                                                                                                                                                                                                                                                                                                                                            |               |               |                                                                                                                                                                                                                                                                                                                                                                                                                                                                                                                                                                                  |   |               |      |   |               |   |   |               |   |   |               |   |
| 1                              | 457.00>331.00                  | 22                                                                                                                                                                                                                                                                                                                                                                                                                                                                                                                                                                                                |                                                                                                                                                                                                                                      |     |      |   |               |    |                                                                                                                                                                                                                                                                                                                                                                                                                                             |               |     |                                                                                                                                                                                                                                                                                                                                                                                                                                                                                                            |               |               |                                                                                                                                                                                                                                                                                                                                                                                                                                                                                                                                                                                  |   |               |      |   |               |   |   |               |   |   |               |   |
| 2                              | 457.00>305.00                  | 248                                                                                                                                                                                                                                                                                                                                                                                                                                                                                                                                                                                               |                                                                                                                                                                                                                                      |     |      |   |               |    |                                                                                                                                                                                                                                                                                                                                                                                                                                             |               |     |                                                                                                                                                                                                                                                                                                                                                                                                                                                                                                            |               |               |                                                                                                                                                                                                                                                                                                                                                                                                                                                                                                                                                                                  |   |               |      |   |               |   |   |               |   |   |               |   |
| 3                              | 457.00>457.00                  | 102680                                                                                                                                                                                                                                                                                                                                                                                                                                                                                                                                                                                            |                                                                                                                                                                                                                                      |     |      |   |               |    |                                                                                                                                                                                                                                                                                                                                                                                                                                             |               |     |                                                                                                                                                                                                                                                                                                                                                                                                                                                                                                            |               |               |                                                                                                                                                                                                                                                                                                                                                                                                                                                                                                                                                                                  |   |               |      |   |               |   |   |               |   |   |               |   |
| #                              | m/z                            | Area                                                                                                                                                                                                                                                                                                                                                                                                                                                                                                                                                                                              |                                                                                                                                                                                                                                      |     |      |   |               |    |                                                                                                                                                                                                                                                                                                                                                                                                                                             |               |     |                                                                                                                                                                                                                                                                                                                                                                                                                                                                                                            |               |               |                                                                                                                                                                                                                                                                                                                                                                                                                                                                                                                                                                                  |   |               |      |   |               |   |   |               |   |   |               |   |
| 1                              | 457.00>331.00                  | 0                                                                                                                                                                                                                                                                                                                                                                                                                                                                                                                                                                                                 |                                                                                                                                                                                                                                      |     |      |   |               |    |                                                                                                                                                                                                                                                                                                                                                                                                                                             |               |     |                                                                                                                                                                                                                                                                                                                                                                                                                                                                                                            |               |               |                                                                                                                                                                                                                                                                                                                                                                                                                                                                                                                                                                                  |   |               |      |   |               |   |   |               |   |   |               |   |
| 2                              | 457.00>305.00                  | 0                                                                                                                                                                                                                                                                                                                                                                                                                                                                                                                                                                                                 |                                                                                                                                                                                                                                      |     |      |   |               |    |                                                                                                                                                                                                                                                                                                                                                                                                                                             |               |     |                                                                                                                                                                                                                                                                                                                                                                                                                                                                                                            |               |               |                                                                                                                                                                                                                                                                                                                                                                                                                                                                                                                                                                                  |   |               |      |   |               |   |   |               |   |   |               |   |
| 3                              | 457.00>457.00                  | 0                                                                                                                                                                                                                                                                                                                                                                                                                                                                                                                                                                                                 |                                                                                                                                                                                                                                      |     |      |   |               |    |                                                                                                                                                                                                                                                                                                                                                                                                                                             |               |     |                                                                                                                                                                                                                                                                                                                                                                                                                                                                                                            |               |               |                                                                                                                                                                                                                                                                                                                                                                                                                                                                                                                                                                                  |   |               |      |   |               |   |   |               |   |   |               |   |
| Rutin                          | 609.00>301.00<br>609.00>609.00 |  <p>609.00&gt;609.00(-)@42 (1)ID# 42 m/z: 609.00&gt;301.00<br/>Type:Target<br/>Name:Rutin<br/>Ret.Time:0.000<br/>Area:0<br/>Conc.:N.D.(Peak)</p> <table border="1"> <thead> <tr> <th>#</th> <th>m/z</th> <th>Area</th> </tr> </thead> <tbody> <tr> <td>1</td> <td>609.00&gt;179.00</td> <td>0</td> </tr> <tr> <td>2</td> <td>609.00&gt;151.00</td> <td>0</td> </tr> <tr> <td>3</td> <td>609.00&gt;609.00</td> <td>0</td> </tr> </tbody> </table> <p>⊖%<br/>0.00</p>                                            | #                                                                                                                                                                                                                                    | m/z | Area | 1 | 609.00>179.00 | 0  | 2                                                                                                                                                                                                                                                                                                                                                                                                                                           | 609.00>151.00 | 0   | 3                                                                                                                                                                                                                                                                                                                                                                                                                                                                                                          | 609.00>609.00 | 0             |  <p>609.00&gt;609.00(-)@42 (1)ID# 42 m/z: 609.00&gt;301.00<br/>Type:Target<br/>Name:Rutin<br/>Ret.Time:0.000<br/>Area:0<br/>Conc.:N.D.(Peak)</p> <table border="1"> <thead> <tr> <th>#</th> <th>m/z</th> <th>Area</th> </tr> </thead> <tbody> <tr> <td>1</td> <td>609.00&gt;179.00</td> <td>0</td> </tr> <tr> <td>2</td> <td>609.00&gt;151.00</td> <td>0</td> </tr> <tr> <td>3</td> <td>609.00&gt;609.00</td> <td>0</td> </tr> </tbody> </table> <p>⊖%<br/>0.00</p>                         | # | m/z           | Area | 1 | 609.00>179.00 | 0 | 2 | 609.00>151.00 | 0 | 3 | 609.00>609.00 | 0 |
| #                              | m/z                            | Area                                                                                                                                                                                                                                                                                                                                                                                                                                                                                                                                                                                              |                                                                                                                                                                                                                                      |     |      |   |               |    |                                                                                                                                                                                                                                                                                                                                                                                                                                             |               |     |                                                                                                                                                                                                                                                                                                                                                                                                                                                                                                            |               |               |                                                                                                                                                                                                                                                                                                                                                                                                                                                                                                                                                                                  |   |               |      |   |               |   |   |               |   |   |               |   |
| 1                              | 609.00>179.00                  | 0                                                                                                                                                                                                                                                                                                                                                                                                                                                                                                                                                                                                 |                                                                                                                                                                                                                                      |     |      |   |               |    |                                                                                                                                                                                                                                                                                                                                                                                                                                             |               |     |                                                                                                                                                                                                                                                                                                                                                                                                                                                                                                            |               |               |                                                                                                                                                                                                                                                                                                                                                                                                                                                                                                                                                                                  |   |               |      |   |               |   |   |               |   |   |               |   |
| 2                              | 609.00>151.00                  | 0                                                                                                                                                                                                                                                                                                                                                                                                                                                                                                                                                                                                 |                                                                                                                                                                                                                                      |     |      |   |               |    |                                                                                                                                                                                                                                                                                                                                                                                                                                             |               |     |                                                                                                                                                                                                                                                                                                                                                                                                                                                                                                            |               |               |                                                                                                                                                                                                                                                                                                                                                                                                                                                                                                                                                                                  |   |               |      |   |               |   |   |               |   |   |               |   |
| 3                              | 609.00>609.00                  | 0                                                                                                                                                                                                                                                                                                                                                                                                                                                                                                                                                                                                 |                                                                                                                                                                                                                                      |     |      |   |               |    |                                                                                                                                                                                                                                                                                                                                                                                                                                             |               |     |                                                                                                                                                                                                                                                                                                                                                                                                                                                                                                            |               |               |                                                                                                                                                                                                                                                                                                                                                                                                                                                                                                                                                                                  |   |               |      |   |               |   |   |               |   |   |               |   |
| #                              | m/z                            | Area                                                                                                                                                                                                                                                                                                                                                                                                                                                                                                                                                                                              |                                                                                                                                                                                                                                      |     |      |   |               |    |                                                                                                                                                                                                                                                                                                                                                                                                                                             |               |     |                                                                                                                                                                                                                                                                                                                                                                                                                                                                                                            |               |               |                                                                                                                                                                                                                                                                                                                                                                                                                                                                                                                                                                                  |   |               |      |   |               |   |   |               |   |   |               |   |
| 1                              | 609.00>179.00                  | 0                                                                                                                                                                                                                                                                                                                                                                                                                                                                                                                                                                                                 |                                                                                                                                                                                                                                      |     |      |   |               |    |                                                                                                                                                                                                                                                                                                                                                                                                                                             |               |     |                                                                                                                                                                                                                                                                                                                                                                                                                                                                                                            |               |               |                                                                                                                                                                                                                                                                                                                                                                                                                                                                                                                                                                                  |   |               |      |   |               |   |   |               |   |   |               |   |
| 2                              | 609.00>151.00                  | 0                                                                                                                                                                                                                                                                                                                                                                                                                                                                                                                                                                                                 |                                                                                                                                                                                                                                      |     |      |   |               |    |                                                                                                                                                                                                                                                                                                                                                                                                                                             |               |     |                                                                                                                                                                                                                                                                                                                                                                                                                                                                                                            |               |               |                                                                                                                                                                                                                                                                                                                                                                                                                                                                                                                                                                                  |   |               |      |   |               |   |   |               |   |   |               |   |
| 3                              | 609.00>609.00                  | 0                                                                                                                                                                                                                                                                                                                                                                                                                                                                                                                                                                                                 |                                                                                                                                                                                                                                      |     |      |   |               |    |                                                                                                                                                                                                                                                                                                                                                                                                                                             |               |     |                                                                                                                                                                                                                                                                                                                                                                                                                                                                                                            |               |               |                                                                                                                                                                                                                                                                                                                                                                                                                                                                                                                                                                                  |   |               |      |   |               |   |   |               |   |   |               |   |

CSP Identified fragments according to the LC/MS-MS results
